# Supplementary material
Source: MDPI journal article supplement (https://www.mdpi.com/search?q=microorganisms-07-00712)
Supplement: s001 [file microorganisms-07-00712-s001.pdf]

# Identification of Insect-Deterrent Metabolites from *Acremonium maseei* strain CICY026, a Saprophytic Fungus from a Sinkhole in Yucatán

Ana L. Ruiz-Jiménez<sup>1</sup>, Esaú Ruiz-Sánchez<sup>2</sup>, Gabriela Heredia<sup>3</sup>, Raúl Tapia-Tussell<sup>4</sup>, Azucena González-Coloma<sup>5</sup>, Karla Peraza-Jiménez<sup>1</sup>, Felicia A. Moo-Koh<sup>1</sup>, Irma L. Medina-Baizabal<sup>1</sup>, Yanet Hernández-Romero<sup>6</sup>, Gonzalo J. Mena-Rejón<sup>7</sup>, Ramiro F. Quijano-Quiñones<sup>7</sup> and Marcela Gamboa-Angulo<sup>1,\*</sup>

<sup>1</sup> Unidad de Biotecnología, Centro de Investigación Científica de Yucatán, A.C. Calle 43 x 32 y 34, No. 130, Col. Chuburná, Mérida, Yucatán, 97205, México. E-Mail: [aruiz\\_ji@hotmail.com](mailto:aruiz_ji@hotmail.com) (A.L.R.-J.); [kalicia11@hotmail.com](mailto:kalicia11@hotmail.com) (K.P.-J.); [famk22@hotmail.com](mailto:famk22@hotmail.com) (F.M.-K.); [baizabal@cicy.mx](mailto:baizabal@cicy.mx) (I.L.M.-B.); [mmarcela@cicy.mx](mailto:mmarcela@cicy.mx) (M.G.-A.)

<sup>2</sup> Tecnológico Nacional de México. Instituto Tecnológico de Conkal. Avenida Tecnológico s/n, C.P. 97345. Conkal, Yucatán, México; E-mail: [esau.ruiz@itconkal.edu.mx](mailto:esau.ruiz@itconkal.edu.mx) (E.R.-S.)

<sup>3</sup> Red de Diversidad y Sistemática, Instituto de Ecología, A.C. Km 2.5 Carretera antigua a Xalapa-Coatepec No. 351, Xalapa 91070, Veracruz, México. E-Mail: [gabriela.heredia@inecol.mx](mailto:gabriela.heredia@inecol.mx) (G.A.)

<sup>4</sup> Unidad de Energías Renovables, Centro de Investigación Científica de Yucatán, A.C. Calle 43 No. 130, Col. Chuburná, Mérida, Yucatán, 97205, México. E-Mail: [rtapia@cicy.mx](mailto:rtapia@cicy.mx) (R.T.-T.)

<sup>5</sup> Departamento de Bioplaguicidas, Instituto de Ciencias Agrícolas, CSIC. Serrano 115-dpdo. Madrid, 28006, España. E-Mail: [azu@ica.csic.es](mailto:azu@ica.csic.es) (A.G.-C.)

<sup>6</sup> Investigación y Desarrollo, Bioactivos Agroquímicos de México, S. de R. L. de C. V. Ave. Río Pánuco 4345, Col. Campestre, Nuevo Laredo, Tamaulipas, 88278, México. E-Mail: [yan1227@hotmail.com](mailto:yan1227@hotmail.com) (Y.H.-R.)

<sup>7</sup> Facultad de Química, Universidad Autónoma de Yucatán. Calle 43 No. 163, Col. Inalámbrica, C.P. 97069 Mérida, Yucatán, México. E-Mail: [ramiro.quijano@uady.mx](mailto:ramiro.quijano@uady.mx) (R.F.Q.-Q.); [mrejon@correo.uady.mx](mailto:mrejon@correo.uady.mx) (G.J.M.-R.)

\*Correspondence: E-mail: [mmarcela@cicy.mx](mailto:mmarcela@cicy.mx) (M.G.-A.). Tel. +52-999-981-3923; Fax +52-999-981-3900

## Contents:

A. Compound 1 NMR spectra: 1. Proton, 2. Carbon, 3. COSY, 4. HSQC, 5. HMBC and 6. NOESY

B. Compound 2 NMR spectra: 1. Proton and 2. Carbon



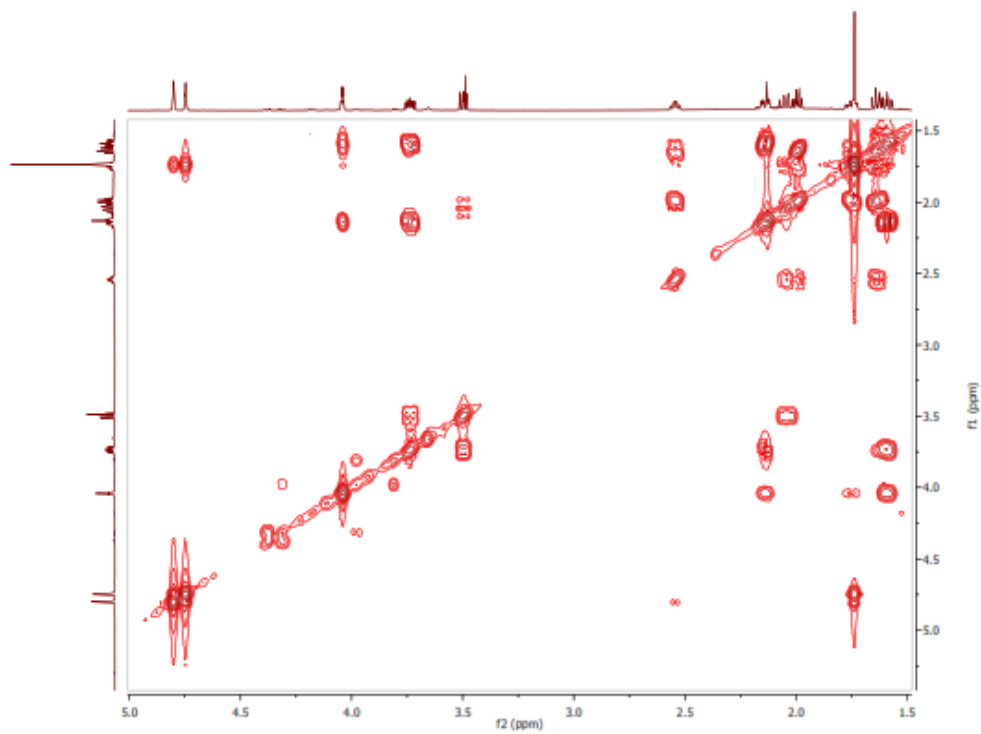

A3.  $^1\text{H}$   $^1\text{H}$ -COSY spectrum of compound **1** ( $\text{CDCl}_3$ , 600 MHz)

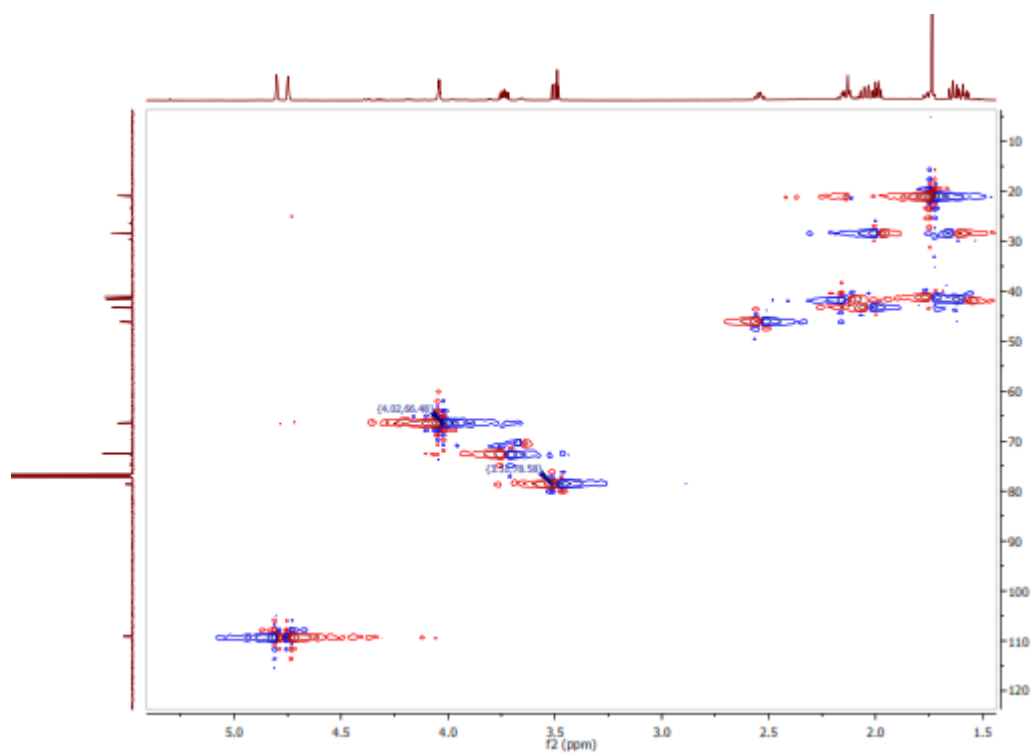

A4. HSQC spectrum of compound **1** ( $\text{CDCl}_3$ )

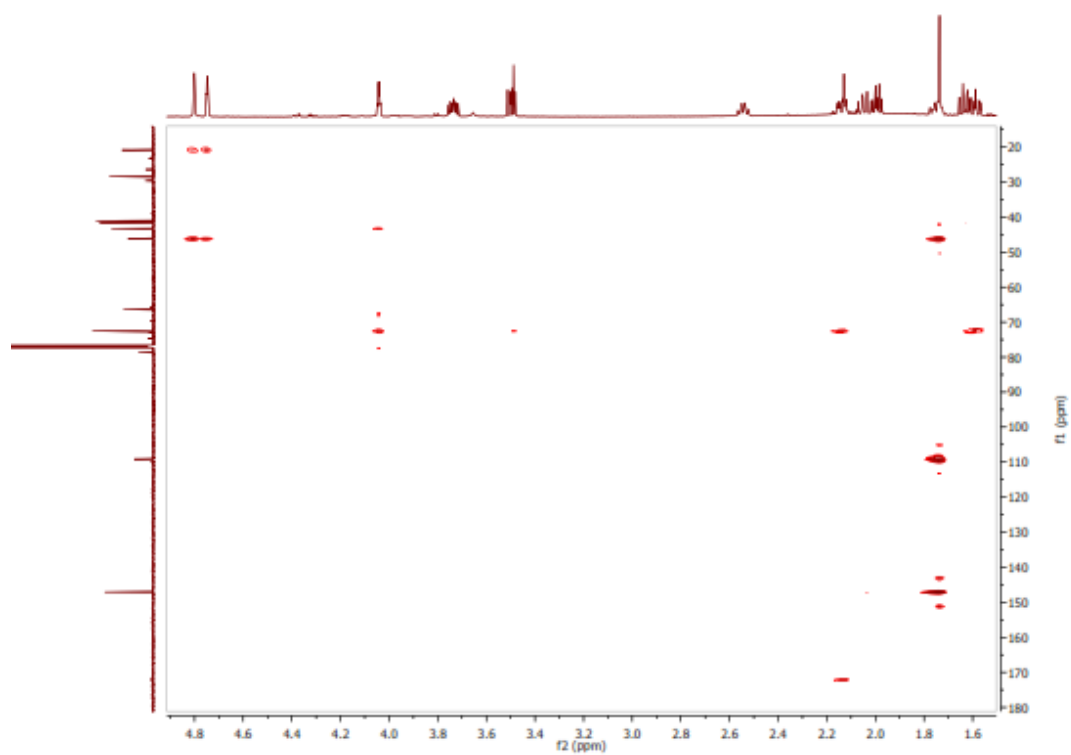

A5. HMBC spectrum of compound 1 (CDCl<sub>3</sub>)

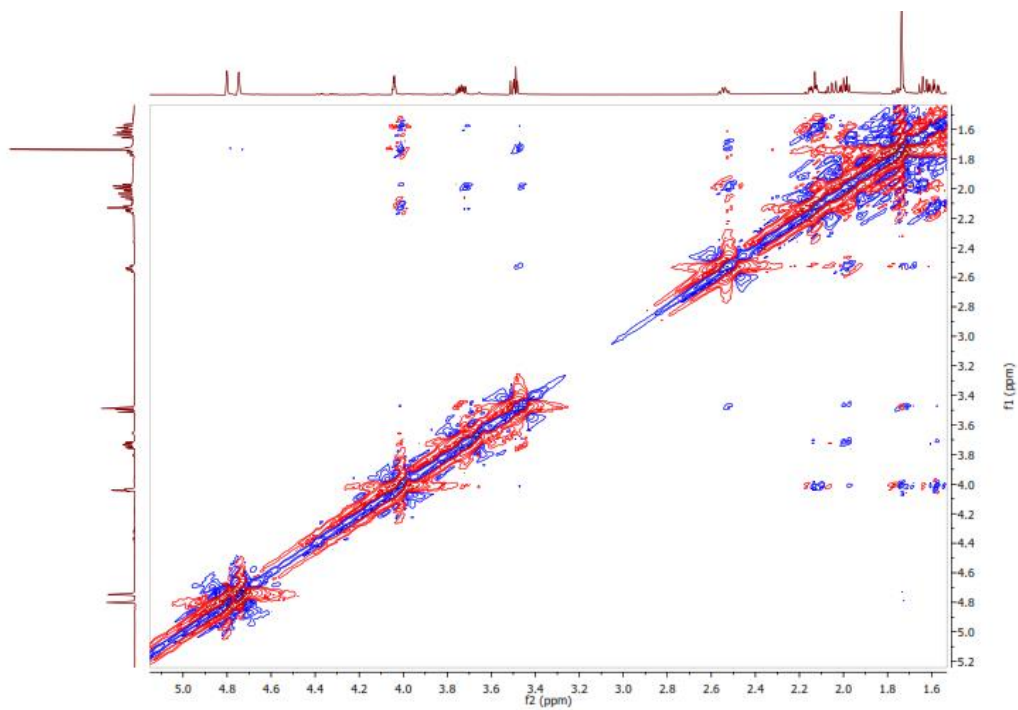

A6. NOESY spectrum of compound 1 (CDCl<sub>3</sub>, 400 MHz)

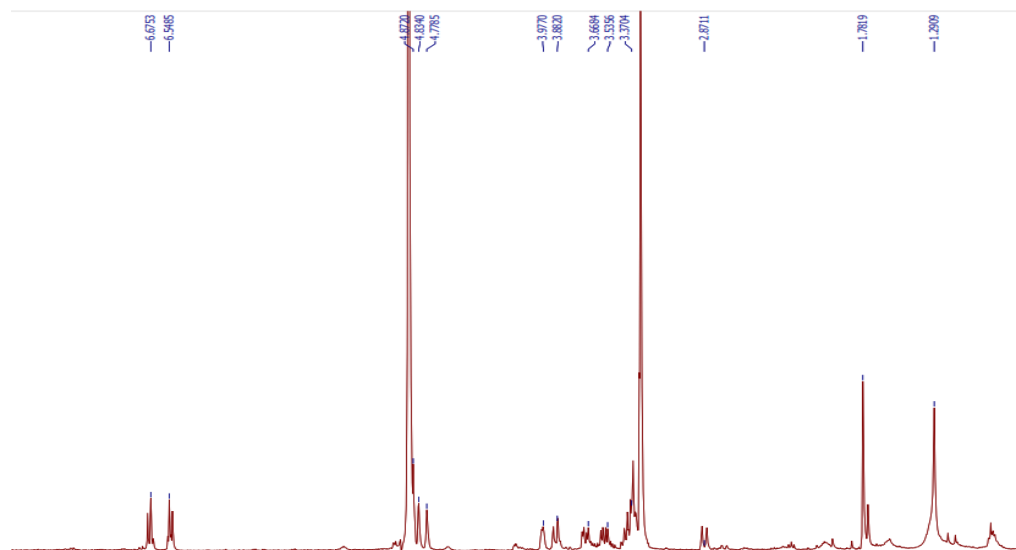

**B1.**  $^1\text{H}$  spectrum of compound **2** ( $\text{CD}_3\text{OD}$ , 400 MHz)

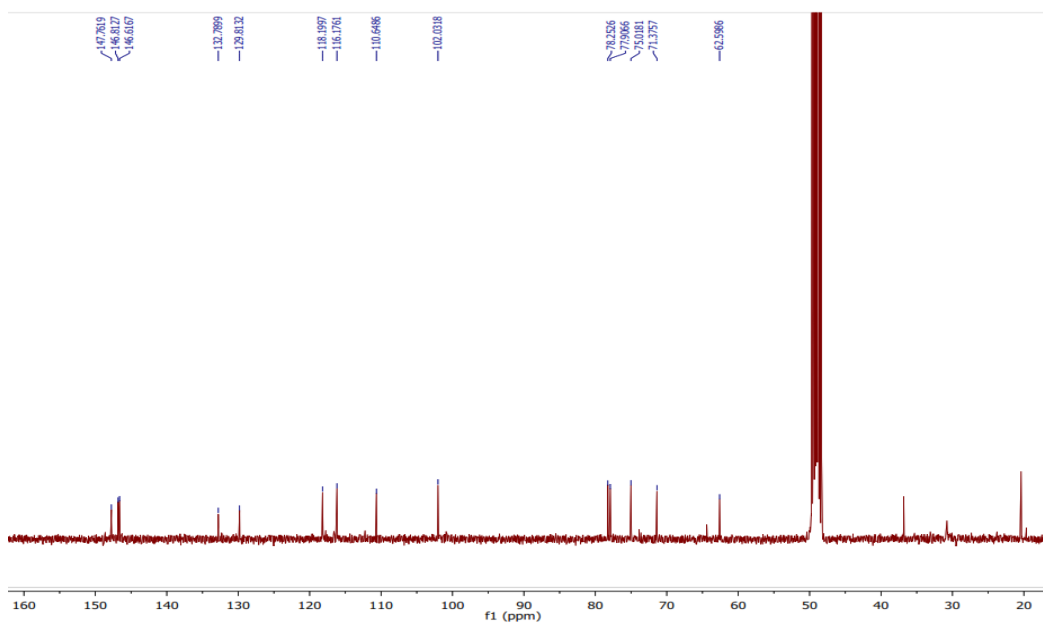

**B2.**  $^{13}\text{C}$  spectrum of compound **2** ( $\text{CD}_3\text{OD}$ , 100 MHz)
